# Supplementary material
Source: PubMed Central journal article supplement (PMC2427304)

## Supplemental Data

### **Monozygotic twins reveal germ-line contribution to allelic expression differences**

Vivian G. Cheung<sup>\*1,2,3</sup>, Alan Bruzel<sup>1</sup>, Joshua T. Burdick<sup>4</sup>, Michael Morley<sup>2</sup>,  
James L. Devlin<sup>3,5</sup>, Richard S. Spielman<sup>\*3</sup>

Table S1. 163 SNPs with significant evidence of differential allelic expression

| Gene Name | Accession No. | SNP ID     | Chrom | # of heterozygotes <sup>1</sup> | Mean a(a+b) | SD a(a+b) | SE <sup>2</sup> units | Maximum a(a+b) | Minimum a(a+b) |
|-----------|---------------|------------|-------|---------------------------------|-------------|-----------|-----------------------|----------------|----------------|
| B3GTL     | NM_194318     | rs912603   | 13    | 8                               | 0.916       | 0.06      | 21.39                 | 0.99           | 0.82           |
| CST9      | NM_001008693  | rs726217   | 20    | 6                               | 0.811       | 0.14      | 5.64                  | 0.89           | 0.54           |
| LOC401898 | NM_001013691  | rs185926   | 19    | 9                               | 0.701       | 0.12      | 4.98                  | 0.82           | 0.46           |
| SYNGR1    | NM_004711     | rs1010169  | 22    | 13                              | 0.697       | 0.22      | 3.24                  | 1.00           | 0.34           |
| LY75      | NM_002349     | rs1397706  | 2     | 5                               | 0.691       | 0.04      | 9.93                  | 0.76           | 0.66           |
| CD44      | NM_000610     | rs1467558  | 11    | 10                              | 0.681       | 0.04      | 14.31                 | 0.74           | 0.62           |
| FABP2     | NM_000134     | rs907205   | 4     | 9                               | 0.67        | 0.09      | 5.54                  | 0.81           | 0.52           |
| PRPF18    | NM_003675     | rs1135102  | 10    | 11                              | 0.67        | 0.13      | 4.51                  | 0.98           | 0.51           |
| DNAH8     | NM_001371     | rs874808   | 6     | 5                               | 0.662       | 0.16      | 2.22                  | 0.80           | 0.47           |
| ZFP64     | NM_018197     | rs3746414  | 20    | 7                               | 0.658       | 0.07      | 6.15                  | 0.76           | 0.55           |
| FBXL17    | NM_022824     | rs1865015  | 5     | 5                               | 0.658       | 0.15      | 2.39                  | 0.81           | 0.48           |
| ITGA4     | NM_000885     | rs1047307  | 2     | 16                              | 0.646       | 0.04      | 14.24                 | 0.75           | 0.60           |
| FLJ43763  | NM_001039892  | rs1418707  | 6     | 6                               | 0.645       | 0.04      | 8.26                  | 0.71           | 0.59           |
| PEL1      | NM_020651     | rs10496105 | 2     | 7                               | 0.644       | 0.02      | 17.32                 | 0.67           | 0.60           |
| CCT5      | NM_012073     | rs2578639  | 5     | 12                              | 0.639       | 0.07      | 7.30                  | 0.74           | 0.52           |
| MLL5      | NM_018682     | rs2240455  | 7     | 6                               | 0.637       | 0.10      | 3.26                  | 0.77           | 0.50           |
| BMF       | NM_001003940  | rs10518679 | 15    | 5                               | 0.637       | 0.02      | 13.92                 | 0.67           | 0.61           |
| LDLR      | NM_000527     | rs688      | 19    | 7                               | 0.623       | 0.05      | 6.26                  | 0.69           | 0.54           |
| SGPL1     | NM_003901     | rs865832   | 10    | 11                              | 0.622       | 0.05      | 8.26                  | 0.69           | 0.54           |
| EPB41     | NM_004437     | rs553253   | 1     | 13                              | 0.62        | 0.02      | 27.04                 | 0.65           | 0.60           |
| DNAJC18   | NM_152686     | rs11477    | 5     | 10                              | 0.615       | 0.02      | 15.81                 | 0.67           | 0.59           |
| TBC1D2B   | NM_015079     | rs10519181 | 15    | 9                               | 0.607       | 0.04      | 8.03                  | 0.64           | 0.51           |
| C14orf150 | NM_080666     | rs10498511 | 14    | 5                               | 0.606       | 0.06      | 4.16                  | 0.67           | 0.54           |
| CHD1L     | NM_004284     | rs6537     | 1     | 17                              | 0.603       | 0.13      | 3.32                  | 0.83           | 0.40           |
| NTSDC3    | NM_016575     | rs9142     | 12    | 14                              | 0.601       | 0.03      | 12.19                 | 0.64           | 0.53           |
| DEADC1    | NM_182503     | rs1138410  | 6     | 10                              | 0.6         | 0.11      | 2.80                  | 0.81           | 0.46           |
| PCDHGB4   | NM_003736     | rs1363448  | 5     | 15                              | 0.595       | 0.18      | 2.10                  | 0.95           | 0.38           |
| CD86      | NM_006889     | rs1129055  | 3     | 15                              | 0.592       | 0.04      | 8.48                  | 0.68           | 0.54           |
| CACNA2D4  | NM_001005737  | rs1044825  | 12    | 12                              | 0.59        | 0.11      | 2.76                  | 0.78           | 0.42           |
| ZNF644    | NM_016620     | rs1188952  | 1     | 7                               | 0.586       | 0.04      | 6.15                  | 0.63           | 0.53           |
| ZNF512    | NM_032434     | rs1881396  | 2     | 11                              | 0.584       | 0.02      | 11.61                 | 0.62           | 0.55           |
| LOC93349  | NM_138402     | rs7559665  | 2     | 14                              | 0.583       | 0.03      | 12.42                 | 0.62           | 0.53           |
| VEZT      | NM_017599     | rs4468424  | 12    | 11                              | 0.582       | 0.04      | 7.35                  | 0.66           | 0.53           |
| PPP1R12B  | NM_002481     | rs2137435  | 1     | 7                               | 0.57        | 0.06      | 3.14                  | 0.65           | 0.50           |
| MAPK9     | NM_002752     | rs9605     | 5     | 16                              | 0.569       | 0.02      | 16.24                 | 0.60           | 0.54           |
| GTF3C4    | NM_012204     | rs462791   | 9     | 14                              | 0.569       | 0.01      | 32.27                 | 0.58           | 0.55           |
| C9orf84   | NM_173521     | rs1407390  | 9     | 11                              | 0.568       | 0.09      | 2.40                  | 0.73           | 0.43           |
| LOC388335 | NM_001004313  | rs435382   | 17    | 16                              | 0.564       | 0.05      | 5.12                  | 0.66           | 0.48           |
| GPR55     | NM_005683     | rs1992188  | 2     | 13                              | 0.561       | 0.09      | 2.50                  | 0.66           | 0.41           |
| DIP13B    | NM_018171     | rs9143     | 12    | 11                              | 0.56        | 0.05      | 3.90                  | 0.65           | 0.47           |
| HECA      | NM_016217     | rs7745259  | 6     | 10                              | 0.559       | 0.05      | 3.97                  | 0.63           | 0.48           |
| STAM2     | NM_005843     | rs10497094 | 2     | 7                               | 0.559       | 0.02      | 9.18                  | 0.59           | 0.53           |
| PARP11    | NM_020367     | rs758799   | 12    | 6                               | 0.557       | 0.02      | 9.31                  | 0.58           | 0.54           |
| TOMM7     | NM_019059     | rs1054471  | 7     | 19                              | 0.556       | 0.05      | 5.31                  | 0.64           | 0.49           |
| ZNF398    | NM_020781     | rs1044358  | 7     | 18                              | 0.556       | 0.06      | 3.71                  | 0.72           | 0.44           |
| HLA-DRA   | NM_019111     | rs1041885  | 6     | 6                               | 0.554       | 0.06      | 2.07                  | 0.61           | 0.44           |
| CUL3      | NM_003590     | rs3768898  | 2     | 8                               | 0.553       | 0.06      | 2.50                  | 0.66           | 0.46           |
| IRF8      | NM_002163     | rs10514611 | 16    | 8                               | 0.551       | 0.02      | 6.56                  | 0.58           | 0.51           |
| C7orf36   | NM_020192     | rs6947660  | 7     | 11                              | 0.55        | 0.02      | 7.54                  | 0.59           | 0.52           |
| SPATA5L1  | NM_024063     | rs1153849  | 15    | 16                              | 0.55        | 0.02      | 10.00                 | 0.58           | 0.50           |
| HLA-B     | NM_005514     | rs2770     | 6     | 16                              | 0.549       | 0.06      | 3.16                  | 0.65           | 0.45           |
| CD80      | NM_005191     | rs1599796  | 3     | 11                              | 0.549       | 0.01      | 11.61                 | 0.58           | 0.53           |
| PHCA      | NM_018367     | rs3740767  | 11    | 11                              | 0.543       | 0.04      | 3.32                  | 0.61           | 0.45           |
| C20orf55  | NM_001042353  | rs2282051  | 20    | 5                               | 0.542       | 0.03      | 3.03                  | 0.57           | 0.49           |
| ANKRD28   | NM_015199     | rs2470549  | 3     | 14                              | 0.541       | 0.06      | 2.74                  | 0.64           | 0.45           |
| NAV2      | NM_145117     | rs2028570  | 11    | 9                               | 0.541       | 0.05      | 2.32                  | 0.65           | 0.45           |
| APOBEC2   | NM_006789     | rs2076472  | 6     | 10                              | 0.54        | 0.05      | 2.69                  | 0.66           | 0.48           |
| BIRC3     | NM_001165     | rs3460     | 11    | 6                               | 0.538       | 0.03      | 3.58                  | 0.58           | 0.51           |
| COX4NB    | NM_006067     | rs8587     | 16    | 18                              | 0.536       | 0.03      | 4.93                  | 0.60           | 0.49           |
| ZNF192    | NM_006298     | rs9295759  | 6     | 11                              | 0.535       | 0.02      | 6.45                  | 0.57           | 0.51           |
| IFRD1     | NM_001007245  | rs7817     | 7     | 11                              | 0.534       | 0.04      | 3.22                  | 0.59           | 0.45           |
| RRN3      | NM_018427     | rs3751877  | 16    | 6                               | 0.533       | 0.02      | 4.75                  | 0.55           | 0.51           |
| ZNF313    | NM_018683     | rs6067282  | 20    | 18                              | 0.53        | 0.03      | 5.09                  | 0.57           | 0.48           |
| CD80      | NM_005191     | rs1599795  | 3     | 11                              | 0.529       | 0.02      | 5.34                  | 0.55           | 0.48           |
| RERE      | NM_001042681  | rs1058790  | 1     | 15                              | 0.526       | 0.01      | 10.07                 | 0.54           | 0.51           |
| PPIL1     | NM_016059     | rs2071823  | 6     | 13                              | 0.525       | 0.02      | 4.74                  | 0.55           | 0.49           |
| PLEKHA3   | NM_019091     | rs3820979  | 2     | 14                              | 0.524       | 0.03      | 3.10                  | 0.58           | 0.48           |
| GALNT10   | NM_017540     | rs3172941  | 5     | 15                              | 0.524       | 0.04      | 2.51                  | 0.58           | 0.46           |
| ZCCHC10   | NM_017665     | rs3087646  | 5     | 18                              | 0.523       | 0.02      | 6.10                  | 0.56           | 0.50           |
| KIAA0494  | NM_014774     | rs1048380  | 1     | 8                               | 0.523       | 0.02      | 2.96                  | 0.56           | 0.50           |
| PTBP2     | NM_021190     | rs273885   | 1     | 14                              | 0.522       | 0.04      | 2.17                  | 0.58           | 0.44           |
| ZNF134    | NM_003435     | rs2885007  | 19    | 5                               | 0.521       | 0.01      | 3.61                  | 0.54           | 0.51           |
| C1orf26   | NM_017673     | rs10489579 | 1     | 7                               | 0.52        | 0.02      | 2.94                  | 0.55           | 0.50           |
| DRCTN1A   | NM_032581     | rs10488277 | 7     | 12                              | 0.517       | 0.02      | 3.93                  | 0.54           | 0.50           |
| EPM2AIP1  | NM_014805     | rs9311149  | 3     | 14                              | 0.515       | 0.02      | 3.74                  | 0.54           | 0.49           |
| LMNB1     | NM_005573     | rs1051644  | 5     | 16                              | 0.512       | 0.01      | 4.00                  | 0.53           | 0.49           |
| PB1       | NM_018165     | rs3755806  | 3     | 13                              | 0.511       | 0.01      | 2.83                  | 0.53           | 0.49           |
| DCP2      | NM_152624     | rs4778     | 5     | 15                              | 0.507       | 0.01      | 2.46                  | 0.53           | 0.48           |
| APC       | NM_000038     | rs465899   | 5     | 13                              | 0.485       | 0.02      | -3.18                 | 0.51           | 0.46           |
| KIAA0286  | NM_015257     | rs10506351 | 12    | 6                               | 0.484       | 0.01      | -3.27                 | 0.49           | 0.47           |
| WDR45L    | NM_019613     | rs9271     | 17    | 11                              | 0.482       | 0.01      | -4.59                 | 0.51           | 0.46           |
| FAS       | NM_000043     | rs1051070  | 10    | 7                               | 0.481       | 0.01      | -3.87                 | 0.50           | 0.47           |
| EXOC8     | NM_175876     | rs10489609 | 1     | 11                              | 0.481       | 0.02      | -3.50                 | 0.51           | 0.46           |
| FLJ10213  | NM_018029     | rs2231928  | 3     | 11                              | 0.479       | 0.02      | -3.87                 | 0.52           | 0.45           |
| GALNT10   | NM_017540     | rs10796    | 5     | 12                              | 0.479       | 0.03      | -2.80                 | 0.52           | 0.43           |

|             |              |            |    |    |       |      |        |      |      |
|-------------|--------------|------------|----|----|-------|------|--------|------|------|
| C20orf35    | NM_033542    | rs2664543  | 20 | 11 | 0.478 | 0.04 | -2.03  | 0.56 | 0.43 |
| EML4        | NM_019063    | rs6716767  | 2  | 12 | 0.476 | 0.02 | -3.46  | 0.52 | 0.42 |
| ZNF398      | NM_020781    | rs917124   | 7  | 16 | 0.472 | 0.04 | -2.87  | 0.55 | 0.41 |
| PTPN22      | NM_015967    | rs3811021  | 1  | 12 | 0.472 | 0.03 | -3.34  | 0.53 | 0.43 |
| IRF8        | NM_002163    | rs1568391  | 16 | 14 | 0.472 | 0.02 | -5.51  | 0.52 | 0.45 |
| JMY         | NM_152405    | rs10514159 | 5  | 12 | 0.472 | 0.05 | -2.02  | 0.56 | 0.41 |
| NT5DC3      | NM_016575    | rs751448   | 12 | 13 | 0.471 | 0.02 | -4.36  | 0.52 | 0.42 |
| NEK9        | NM_033116    | rs175449   | 14 | 14 | 0.469 | 0.02 | -4.83  | 0.51 | 0.42 |
| KLF12       | NM_007249    | rs1998574  | 13 | 17 | 0.465 | 0.07 | -2.12  | 0.60 | 0.34 |
| SMC2        | NM_001042550 | rs7872034  | 9  | 18 | 0.461 | 0.03 | -5.01  | 0.53 | 0.41 |
| KLHL5       | NM_001007075 | rs3733275  | 4  | 12 | 0.461 | 0.04 | -3.56  | 0.55 | 0.42 |
| KIAA1799    | NM_032437    | rs2273367  | 1  | 9  | 0.459 | 0.05 | -2.32  | 0.54 | 0.38 |
| LOC388335   | NM_001004313 | rs440655   | 17 | 16 | 0.457 | 0.06 | -3.02  | 0.54 | 0.33 |
| FBXW8       | NM_012174    | rs4529958  | 12 | 7  | 0.456 | 0.01 | -8.95  | 0.47 | 0.43 |
| FAM29A      | NM_017645    | rs10511671 | 9  | 7  | 0.456 | 0.02 | -5.82  | 0.49 | 0.43 |
| RP11-19J3.3 | NM_001012267 | rs9299405  | 9  | 15 | 0.454 | 0.08 | -2.12  | 0.57 | 0.27 |
| VAPB        | NM_004738    | rs7400     | 20 | 5  | 0.454 | 0.05 | -2.29  | 0.52 | 0.40 |
| SELI        | NM_033505    | rs3820937  | 2  | 5  | 0.454 | 0.01 | -8.57  | 0.47 | 0.44 |
| PGM2L1      | NM_173582    | rs596976   | 11 | 12 | 0.452 | 0.04 | -4.75  | 0.52 | 0.38 |
| NBN         | NM_001024688 | rs9995     | 8  | 8  | 0.451 | 0.03 | -5.33  | 0.49 | 0.42 |
| C13orf1     | NM_020456    | rs1063183  | 13 | 8  | 0.449 | 0.05 | -3.14  | 0.53 | 0.37 |
| SSR3        | NM_007107    | rs3773714  | 3  | 7  | 0.448 | 0.02 | -8.09  | 0.47 | 0.43 |
| ATF6        | NM_007348    | rs2070151  | 1  | 5  | 0.447 | 0.06 | -2.08  | 0.54 | 0.39 |
| FYCO1       | NM_024513    | rs1994491  | 3  | 6  | 0.446 | 0.01 | -13.23 | 0.45 | 0.43 |
| NR1I2       | NM_003889    | rs10511395 | 3  | 7  | 0.443 | 0.06 | -2.65  | 0.54 | 0.36 |
| EPB41L4A    | NM_022140    | rs7703522  | 5  | 12 | 0.442 | 0.08 | -2.54  | 0.60 | 0.33 |
| DIDO1       | NM_033081    | rs3746765  | 20 | 13 | 0.442 | 0.03 | -6.54  | 0.49 | 0.39 |
| CDC20       | NM_001255    | rs839763   | 1  | 15 | 0.441 | 0.04 | -6.18  | 0.51 | 0.38 |
| ZNF605      | NM_183238    | rs10357    | 12 | 12 | 0.44  | 0.08 | -2.66  | 0.64 | 0.38 |
| RIOK2       | NM_018343    | rs160632   | 5  | 15 | 0.438 | 0.02 | -11.43 | 0.46 | 0.38 |
| USP37       | NM_020935    | rs3755042  | 2  | 17 | 0.437 | 0.01 | -19.98 | 0.45 | 0.41 |
| FLJ20309    | NM_017759    | rs1062344  | 2  | 13 | 0.437 | 0.02 | -15.14 | 0.47 | 0.42 |
| TEC         | NM_003215    | rs1008277  | 4  | 13 | 0.436 | 0.02 | -12.82 | 0.48 | 0.41 |
| TFB1M       | NM_016020    | rs324356   | 6  | 17 | 0.435 | 0.03 | -9.93  | 0.47 | 0.39 |
| GALK2       | NM_001001556 | rs2078024  | 15 | 16 | 0.432 | 0.05 | -6.04  | 0.52 | 0.36 |
| DRCTNNB1A   | NM_032581    | rs1583511  | 7  | 14 | 0.432 | 0.02 | -11.06 | 0.47 | 0.38 |
| DRCTNNB1A   | NM_032581    | rs4607514  | 7  | 14 | 0.431 | 0.01 | -19.86 | 0.44 | 0.41 |
| C10orf89    | NM_153336    | rs3736583  | 10 | 9  | 0.431 | 0.03 | -7.67  | 0.46 | 0.39 |
| CUL3        | NM_003590    | rs10498160 | 2  | 8  | 0.431 | 0.06 | -3.25  | 0.54 | 0.35 |
| HIP1        | NM_005338    | rs1167829  | 7  | 8  | 0.43  | 0.10 | -2.08  | 0.59 | 0.30 |
| TMEM106B    | NM_018374    | rs10488193 | 7  | 13 | 0.43  | 0.03 | -10.10 | 0.49 | 0.39 |
| PSCDBP      | NM_004288    | rs267992   | 2  | 9  | 0.429 | 0.03 | -7.61  | 0.47 | 0.38 |
| CHERP       | NM_006387    | rs17029    | 19 | 15 | 0.429 | 0.01 | -21.15 | 0.45 | 0.41 |
| CKS2        | NM_001827    | rs14867    | 9  | 5  | 0.429 | 0.04 | -3.87  | 0.46 | 0.37 |
| KIAA1797    | NM_017794    | rs10511687 | 9  | 14 | 0.428 | 0.11 | -2.57  | 0.56 | 0.16 |
| UBE2J1      | NM_016021    | rs10502    | 6  | 14 | 0.426 | 0.01 | -23.07 | 0.45 | 0.41 |
| LOC63920    | NM_022090    | rs10515808 | 5  | 9  | 0.422 | 0.01 | -21.27 | 0.44 | 0.40 |
| ANGEL1      | NM_015305    | rs1076584  | 14 | 6  | 0.421 | 0.03 | -6.91  | 0.45 | 0.38 |
| KIAA1799    | NM_032437    | rs6657480  | 1  | 9  | 0.417 | 0.08 | -3.28  | 0.58 | 0.34 |
| ALKBH3      | NM_139178    | rs2292889  | 11 | 8  | 0.415 | 0.03 | -9.62  | 0.45 | 0.38 |
| GAB2        | NM_012296    | rs1385600  | 11 | 7  | 0.415 | 0.04 | -6.08  | 0.47 | 0.37 |
| KLF12       | NM_007249    | rs9318219  | 13 | 15 | 0.411 | 0.05 | -6.89  | 0.50 | 0.30 |
| NRCAM       | NM_001037132 | rs449077   | 7  | 5  | 0.411 | 0.08 | -2.46  | 0.47 | 0.29 |
| ADI1        | NM_018269    | rs1130333  | 2  | 10 | 0.41  | 0.10 | -2.87  | 0.54 | 0.21 |
| KIAA1328    | NM_020776    | rs2017027  | 18 | 5  | 0.407 | 0.03 | -6.30  | 0.45 | 0.37 |
| MKI67       | NM_002417    | rs1894410  | 10 | 6  | 0.407 | 0.02 | -14.24 | 0.43 | 0.38 |
| FAM29A      | NM_017645    | rs10511670 | 9  | 7  | 0.402 | 0.02 | -12.96 | 0.43 | 0.38 |
| AKAP6       | NM_004274    | rs4261436  | 14 | 8  | 0.401 | 0.14 | -1.97  | 0.60 | 0.18 |
| LOXL2       | NM_002318    | rs7834641  | 8  | 8  | 0.394 | 0.11 | -2.70  | 0.53 | 0.19 |
| SLC9A3R1    | NM_004252    | rs7420     | 17 | 17 | 0.393 | 0.02 | -20.05 | 0.43 | 0.35 |
| KIAA1967    | NM_021174    | rs3736147  | 8  | 18 | 0.39  | 0.02 | -24.56 | 0.43 | 0.34 |
| MGC4266     | NM_032680    | rs10491974 | 12 | 8  | 0.389 | 0.14 | -2.24  | 0.62 | 0.23 |
| C6orf151    | NM_152551    | rs1044761  | 6  | 8  | 0.388 | 0.03 | -9.32  | 0.46 | 0.35 |
| DNAJC6      | NM_014787    | rs10493377 | 1  | 19 | 0.386 | 0.12 | -4.14  | 0.71 | 0.25 |
| REPS1       | NM_031922    | rs1044418  | 6  | 6  | 0.386 | 0.04 | -7.76  | 0.44 | 0.35 |
| CUL3        | NM_003590    | rs3768899  | 2  | 8  | 0.38  | 0.06 | -6.17  | 0.45 | 0.29 |
| CD244       | NM_016382    | rs3766377  | 1  | 13 | 0.377 | 0.09 | -5.04  | 0.49 | 0.19 |
| TECTA       | NM_005422    | rs10502247 | 11 | 5  | 0.363 | 0.13 | -2.32  | 0.50 | 0.18 |
| CC2D1B      | NM_032449    | rs7513934  | 1  | 16 | 0.361 | 0.05 | -11.83 | 0.43 | 0.24 |
| DNM3        | NM_015569    | rs4916255  | 1  | 5  | 0.344 | 0.07 | -4.78  | 0.46 | 0.27 |
| OVGP1       | NM_002557    | rs7825     | 1  | 10 | 0.337 | 0.12 | -4.23  | 0.61 | 0.13 |
| QRSL1       | NM_018292    | rs1026619  | 6  | 10 | 0.327 | 0.02 | -23.79 | 0.36 | 0.30 |
| MS4A7       | NM_021201    | rs950802   | 11 | 15 | 0.324 | 0.13 | -5.28  | 0.47 | 0.09 |
| DDX20       | NM_007204    | rs197414   | 1  | 5  | 0.297 | 0.03 | -16.81 | 0.33 | 0.25 |
| NEK10       | NM_152534    | rs10510592 | 3  | 6  | 0.262 | 0.18 | -3.33  | 0.55 | 0.10 |
| NAT10       | NM_024662    | rs8187     | 11 | 8  | 0.234 | 0.05 | -16.01 | 0.33 | 0.19 |
| CYYR1       | NM_052954    | rs966410   | 21 | 12 | 0.228 | 0.16 | -5.82  | 0.61 | 0.03 |
| SERPINB2    | NM_002575    | rs6102     | 18 | 6  | 0.215 | 0.06 | -11.83 | 0.30 | 0.14 |
| TGFA        | NM_003236    | rs503314   | 2  | 5  | 0.138 | 0.13 | -6.27  | 0.34 | 0.00 |

1. # of heterozygotes = one member of each twin pair + unrelated individuals who are heterozygous at the SNP

2. SE = standard error of the mean

| <b>Twin Pair</b> | <b>Sample ID</b> | <b>Sample ID</b> |
|------------------|------------------|------------------|
| A                | GM14381          | GM14382          |
| B                | GM14405          | GM14406          |
| C                | GM14408          | GM14409          |
| D                | GM14414          | GM14417          |
| E                | GM14432          | GM14433          |
| F                | GM14447          | GM14448          |
| G                | GM14452          | GM14453          |
| H                | GM14467          | GM14468          |
| I                | GM14478          | GM14479          |
| J                | GM14506          | GM14507          |
| K                | GM14520          | GM14521          |
| L                | GM14568          | GM14569          |
| M                | GM14581          | GM14582          |
| N                | HB02069          | HB02070          |
| O                | HI0335           | HI0336           |
| P                | HI0355           | HI0356           |
| Q                | HI0364           | HI0366           |
| R                | HI0379           | HI0380           |
| S                | HI0385           | HI0608           |
| T                | HI0505           | HI0506           |
| U                | HI0671           | HI0672           |

Note – 12 pairs (A-F and H-M) were grown and harvested in one batch, and 9 pairs (pair G and pairs N-U) were grown and harvested in a second batch.

Figure S1. Allelic expression ratios in heterozygous MZ twin pairs for 63 SNPs with  $P < 0.05$  for ICC.

rs10498027 in ABCA12  
ICC=0.94 P=2.33e-05

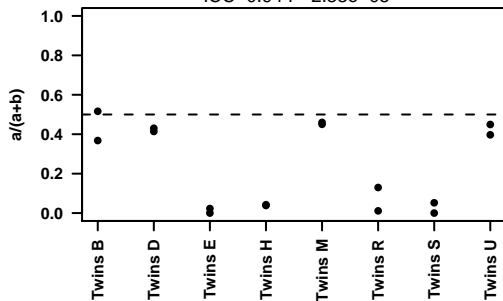

rs1130333 in ADI1  
ICC=0.6 P=3.59e-02

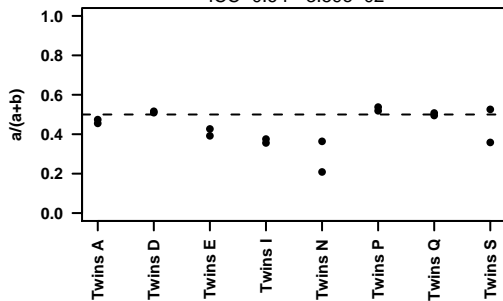

rs2292889 in ALKBH3  
ICC=0.65 P=4.28e-02

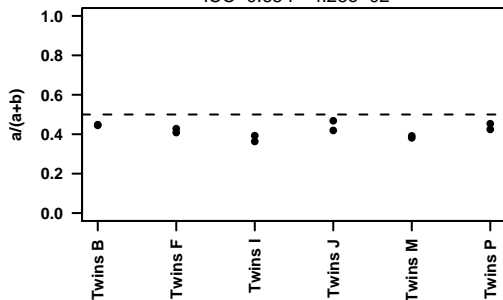

rs2470549 in ANKRD28  
ICC=0.64 P=2.55e-02

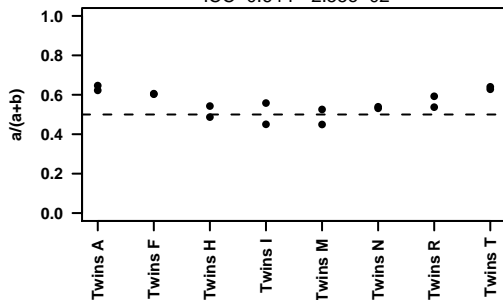

rs2076472 in APOBEC2  
ICC=0.92 P=2.68e-04

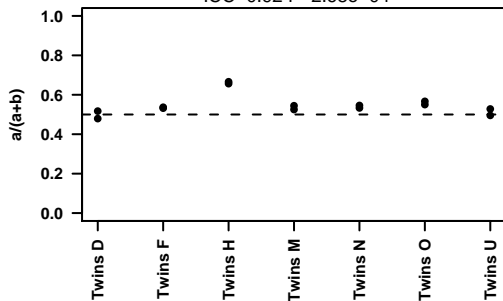

rs10491246 in ARSK  
ICC=0.54 P=4.48e-02

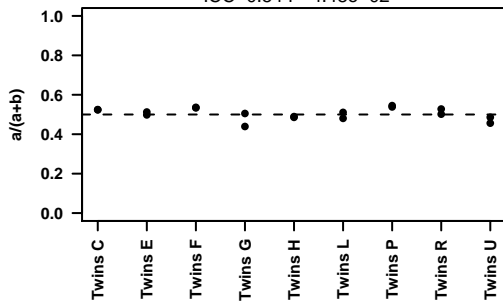

rs469783 in ARTS-1  
ICC=0.64 P=3.02e-03

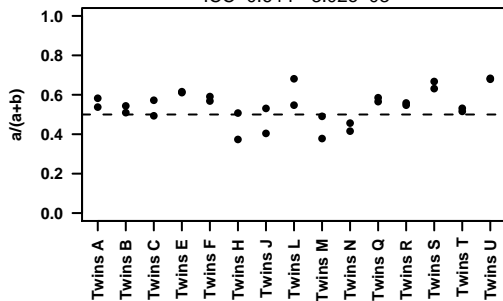

rs2836933 in BRWD1  
ICC=0.76 P=5.42e-04

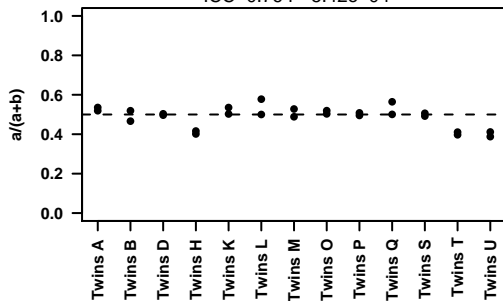

rs4131373 in C1orf174  
ICC=0.91 P=1.36e-04

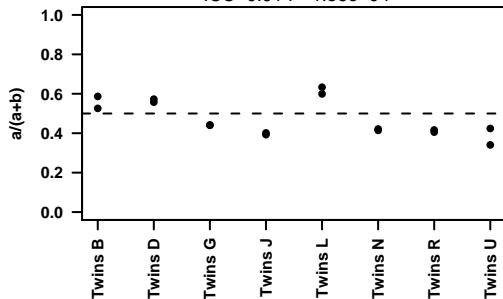

rs2664543 in C20orf35  
ICC=0.88 P=4.45e-04

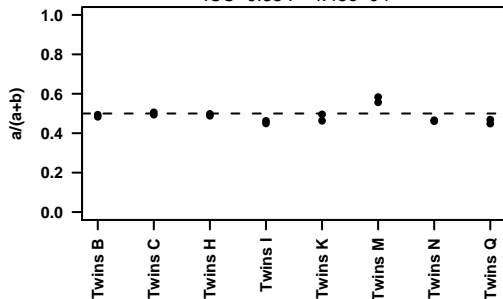

rs707576 in C20orf35  
ICC=0.82 P=1.90e-03

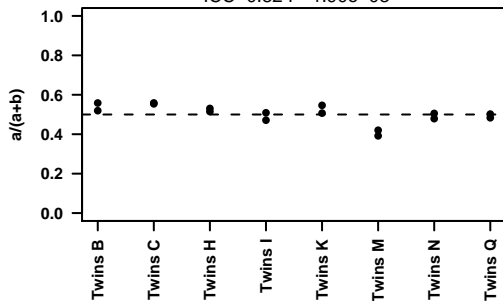

rs10512411 in C9orf84  
ICC=0.75 P=1.01e-02

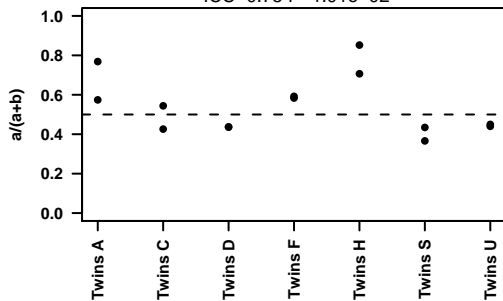

rs2578639 in CCT5  
ICC=0.63 P=1.55e-02

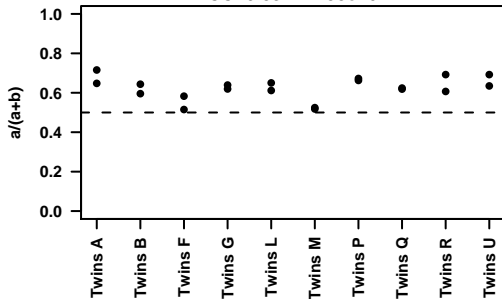

rs485618 in CD244  
ICC=0.56 P=2.04e-02

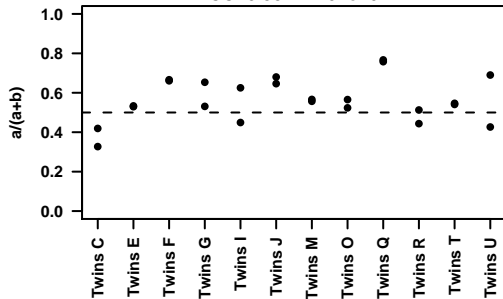

rs1599796 in CD80  
ICC=0.58 P=4.25e-02

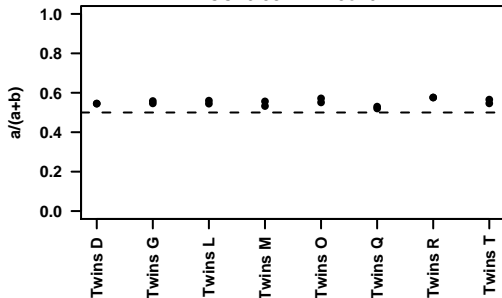

rs8587 in COX4NB  
ICC=0.47 P=4.56e-02

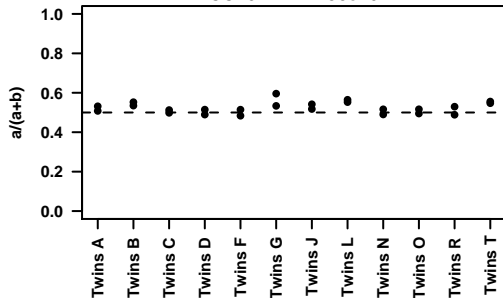

rs7703522 in EPB41L4A  
ICC=0.75 P=1.09e-02

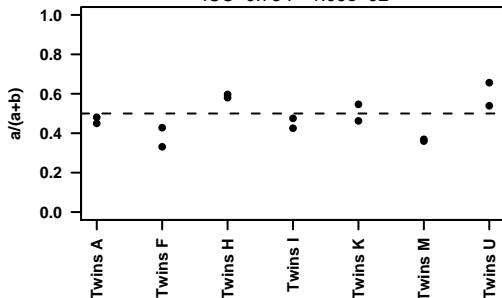

rs10518716 in FLJ11506  
ICC=0.49 P=3.4e-02

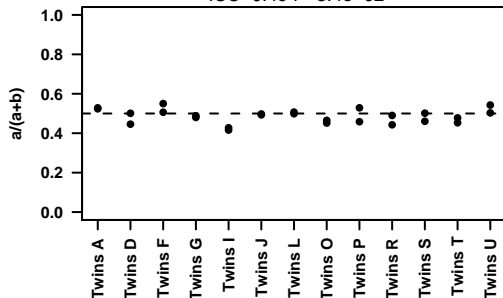



rs379707 in FYB  
ICC=0.66 P=2.8e-03

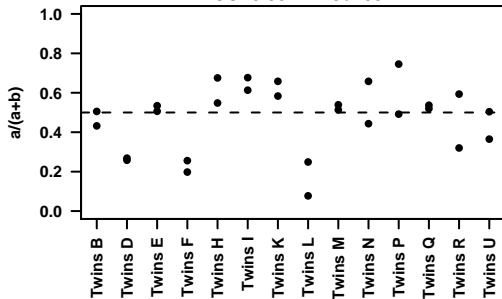

rs3172941 in GALNT10  
ICC=0.72 P=6.97e-03

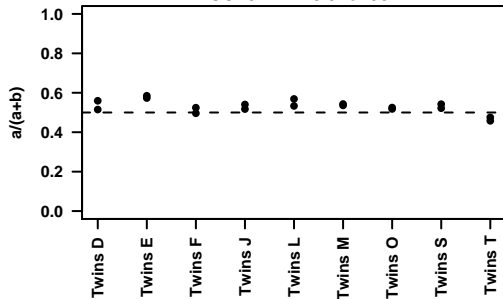

rs10796 in GALNT10  
ICC=0.72 P=1.08e-02

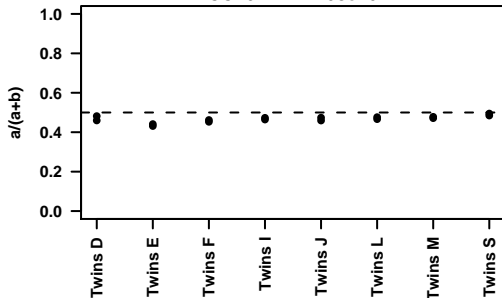

rs707739 in GCNT1  
ICC=0.74 P=1.26e-02

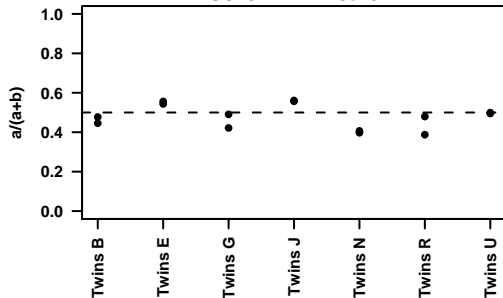

rs1992188 in GPR55  
ICC=0.55 P=4.1e-02

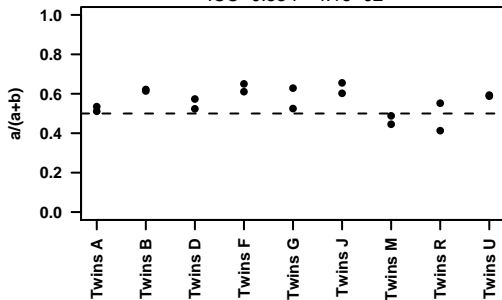

rs462791 in GTF3C4  
ICC=0.57 P=1.76e-02

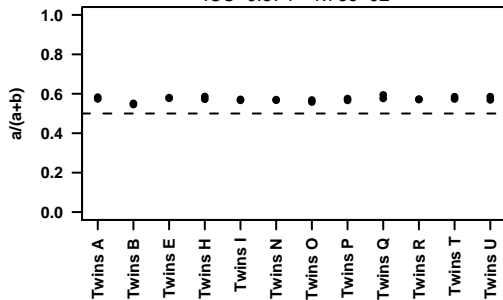

rs1167829 in HIP1  
ICC=0.78 P=2.08e-02

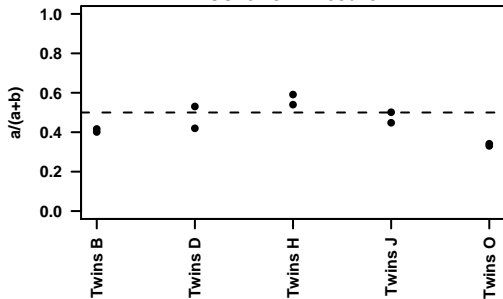

rs10514611 in IRF8  
ICC=0.82 P=6.57e-03

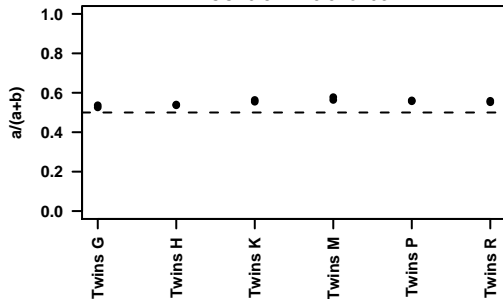

rs9318219 in KLF12  
ICC=0.67 P=1.89e-02

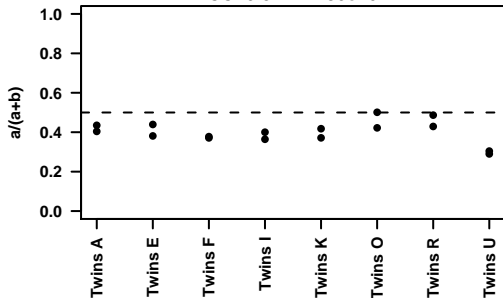

rs3733275 in KLHL5  
ICC=0.55 P=4.1e-02

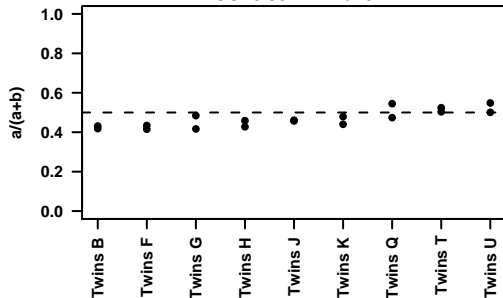

rs435382 in LOC388335  
ICC=0.8 P=3.64e-04

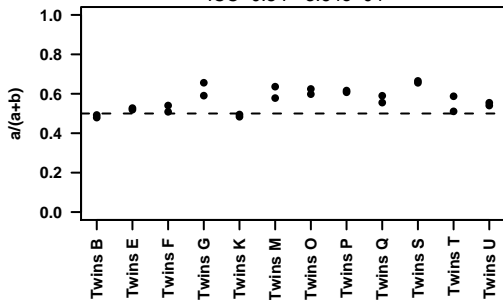

rs440655 in LOC388335  
ICC=0.82 P=1.75e-04

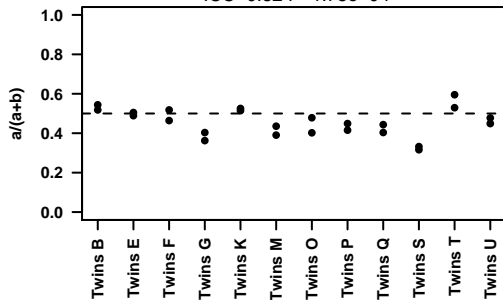

rs7559665 in LOC93349  
ICC=0.62 P=2.92e-02

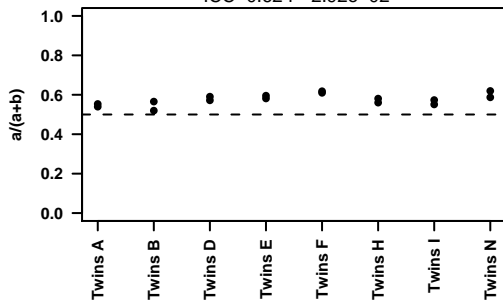

rs950802 in MS4A7  
ICC=0.71 P=2.60e-03

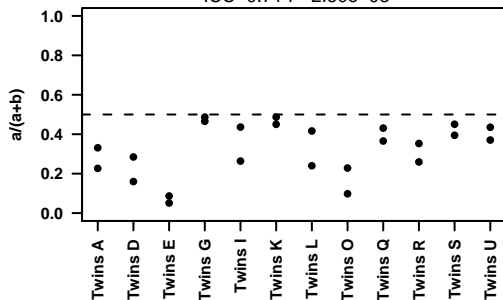

rs10511395 in NR112  
ICC=0.66 P=4.01e-02

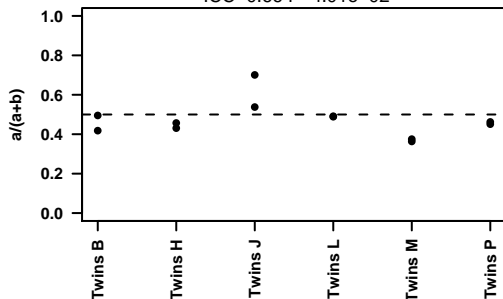

rs9142 in NT5DC3  
ICC=0.53 P=4.08e-02

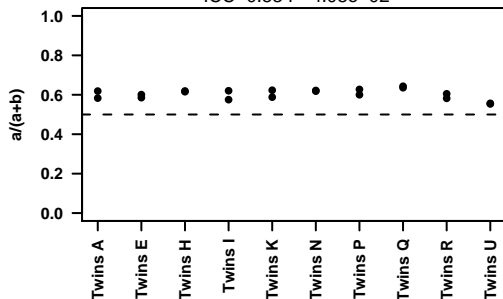

rs7946 in PEMT  
ICC=0.82 P=1.21e-03

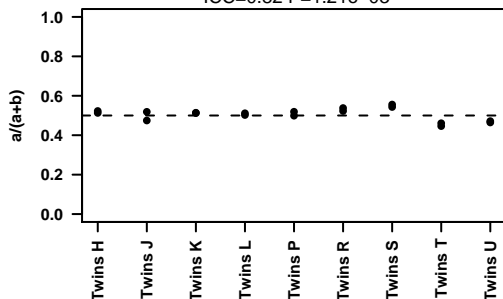

rs2302650 in PRKD3  
ICC=0.74 P=1.24e-02

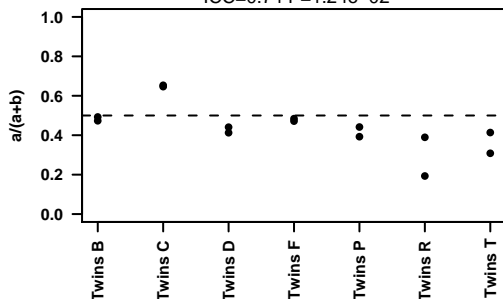

rs267992 in PSCDBP  
ICC=0.62 P=4.03e-02

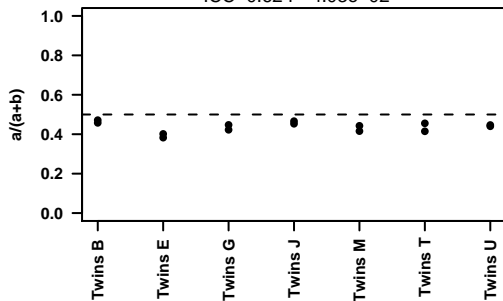

rs1134090 in PTPLAD2  
ICC=0.58 P=2.49e-02

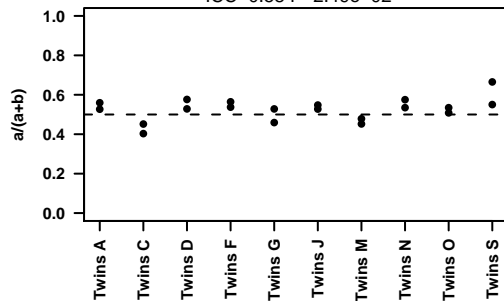

rs1026619 in QRSL1  
ICC=0.66 P=3.99e-02

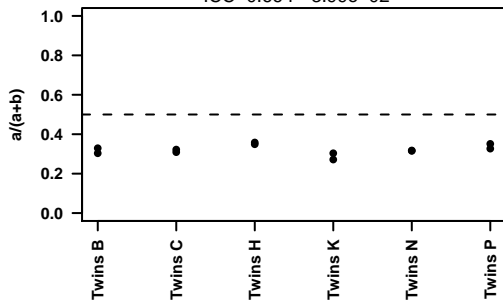

rs1065548 in RAB31  
ICC=0.98 P=5.06e-05

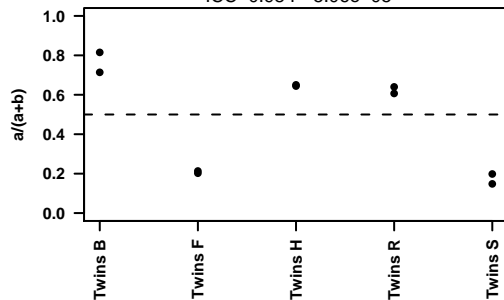

rs1064125 in RAB6IP2  
ICC=0.83 P=4.95e-04

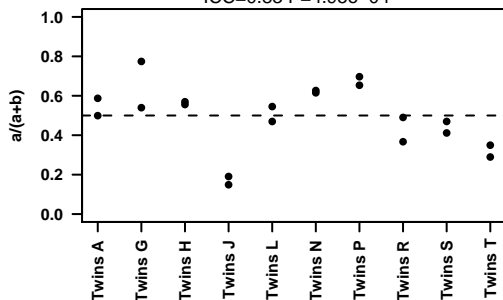

rs2470911 in RNF36  
ICC=0.63 P=2.73e-02

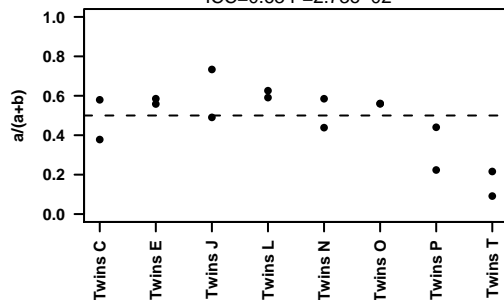

rs90999 in RPS23  
ICC=0.97 P=2.17e-05

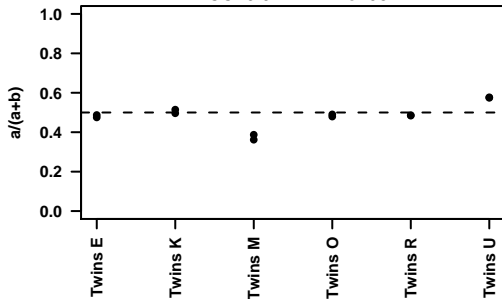

rs3829252 in SBF2  
ICC=0.62 P=2.13e-02

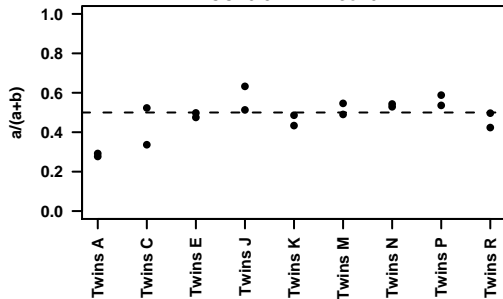

rs6413428 in SEPP1  
ICC=0.57 P=4.64e-02

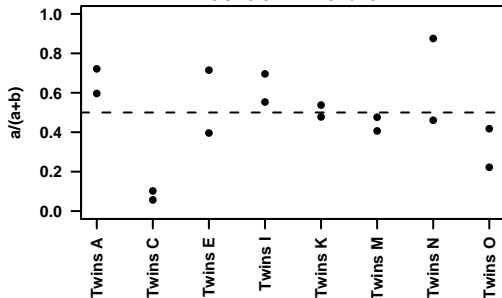

rs13874 in SLC25A26  
ICC=0.61 P=8.16e-03

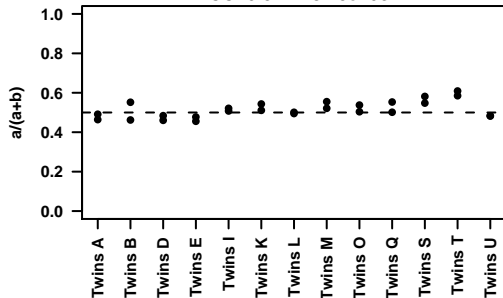

rs7872034 in SMC2  
ICC=0.51 P=3.83e-02

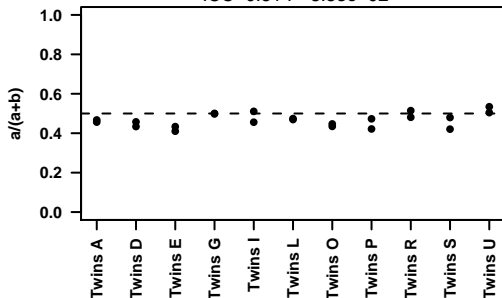

rs10509305 in STOX1  
ICC=0.95 P=4.68e-04

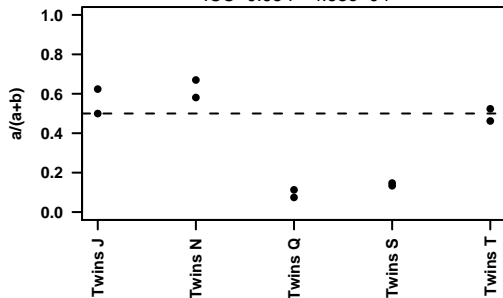

rs10509306 in STOX1  
ICC=0.96 P=1.93e-05

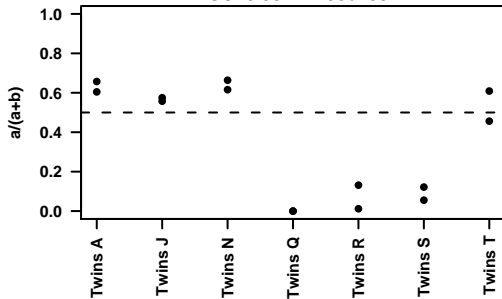

rs1010169 in SYNGR1  
ICC=0.88 P=8.52e-05

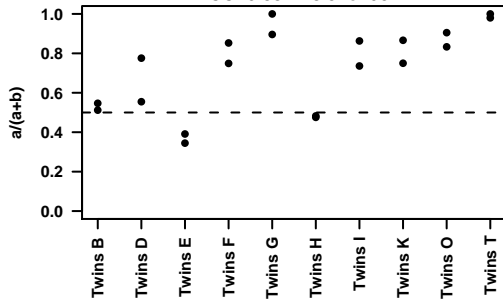

rs1010170 in SYNGR1  
ICC=0.76 P=1.55e-02

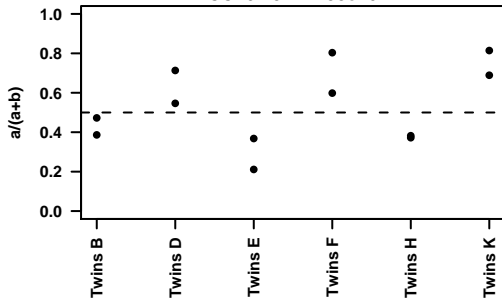

rs597480 in SYTL2  
ICC=0.89 P=1.29e-04

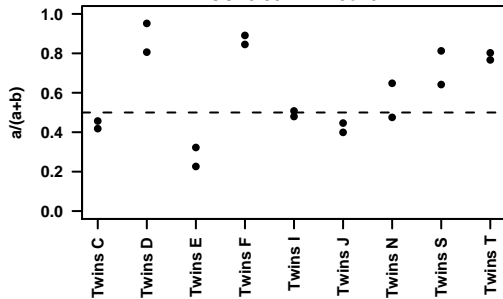

rs10519181 in TBC1D2B  
ICC=0.76 P=2.44e-02

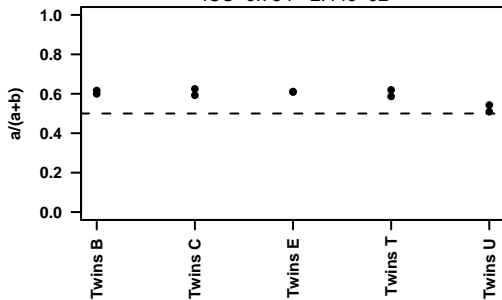

rs10488193 in TMEM106B  
ICC=0.54 P=3.79e-02

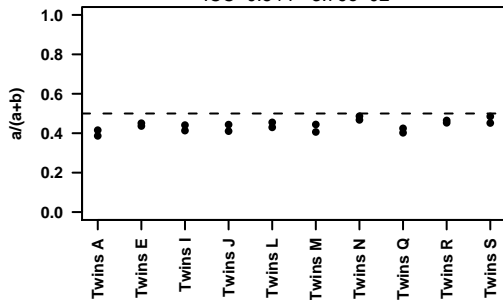

rs3890287 in USP6  
ICC=0.97 P=5.76e-08

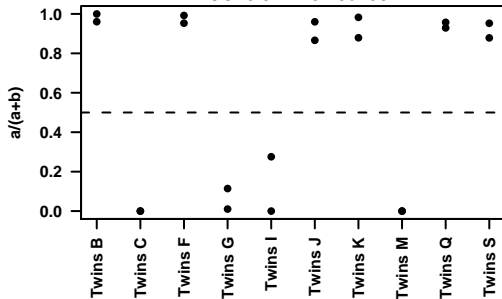

rs4468424 in VEZT  
ICC=0.79 P=5.73e-03

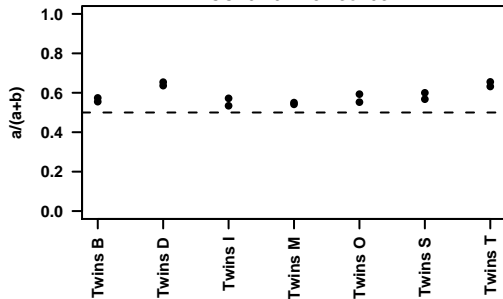

rs8210 in VLDLR  
ICC=0.7 P=1.27e-02

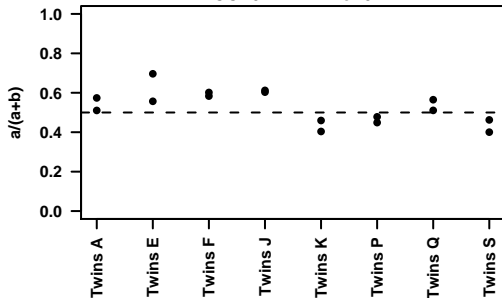

rs1800392 in WRN  
ICC=0.71 P=1.66e-02

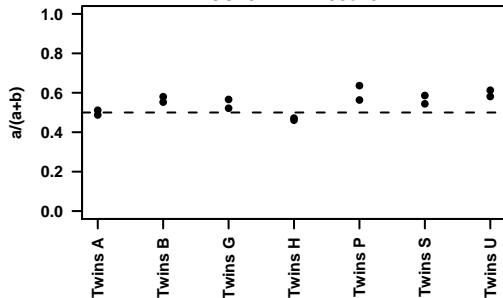

rs3087646 in ZCCHC10  
ICC=0.54 P=3.09e-02

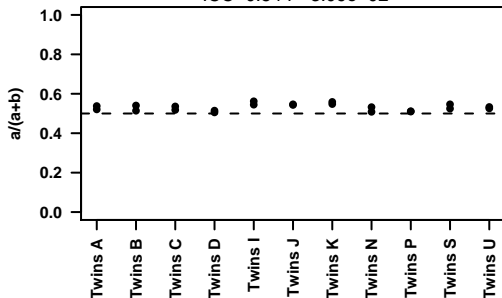

rs2229375 in ZNF135  
ICC=0.5 P=3.01e-02

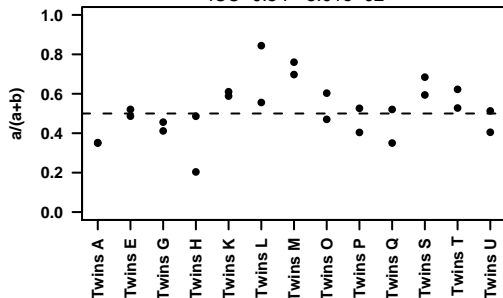

rs9295759 in ZNF192  
ICC=0.67 P=2.58e-02

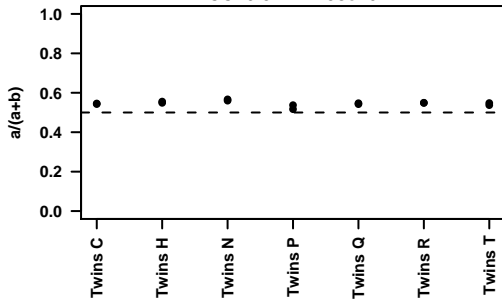

rs6067282 in ZNF313  
ICC=0.7 P=2e-03

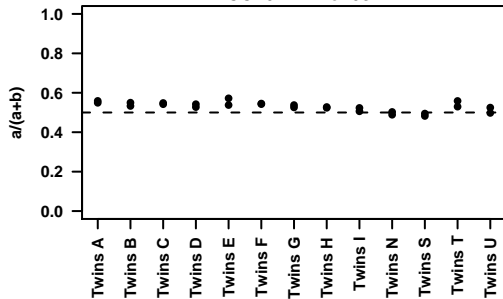

rs10357 in ZNF605  
ICC=0.92 P=1.69e-05

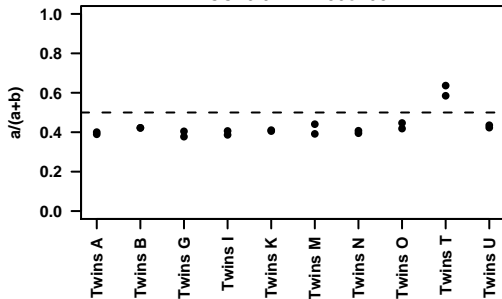

Supplement: mmc1.pdf [file mmc1.pdf]
